# Supplementary material for: Considering health and health disparities during state policy formulation: examining Washington state Health Impact Reviews
Source: Springer Nature journal article supplement (doi:10.1186/s12889-019-7165-7), 2019-07-03
Supplement: MOESM1 [file 16879138]

## JOHNS HOPKINS BLOOMBERG SCHOOL OF PUBLIC HEALTH

### KEY INFORMANT INTERVIEW GUIDE

(LEGISLATOR OR STAFF/EXECUTIVE BRANCH/BOARD OF HEALTH/STAKEHOLDERS)

\*The questions included in this protocol will serve as a general guide for the interviewer.  
Specific follow-up questions may vary

**PI Name: Keshia Pollack, PhD, MPH**

**Study Title: Exploring the Role of Health Impact Reviews in Washington State  
Policymaking**

**IRB No.: 7129**

**PI Version No./Date: Version 1/April 12, 2016**

---

#### **Prior to starting the interview**

Explanation of our research

Reason for the interview

Review oral consent

#### **CONFIRM PERSON'S ROLE/POSITION**

##### **Experience with HIRs**

Can you tell us the various ways that you have interfaced with HIRs (requested one on a bill, read one, cited the findings, etc.)? [Probe based on response]

##### **Perceptions of HIRs**

- What are you overall impressions of HIRs? [Probe]
- Do you think that HIRs have impacted policymakers understanding of how legislative and budgetary proposal could affect public health or health disparities? If yes, why/how and if not, why not?
- Do you think that HIRs have impacted the policy process? If yes, why/how and if not, why not?
- To what extent has the HIR process resulted in challenges or any unintended consequences?

- How might HIRs be even more impactful? What changes could be made to the process to address any challenges or increase their utility?

### **Conclusion**

- Is there anything you would like to tell me about HIRs that we haven't already discussed?
- Who else should we be talking with in order to learn about HIRs?
